# Supplementary material for: New Approach for Automated Explanation of Material Phenomena Using Artificial Neural Networks
Source: Preprints.org preprint supplement (doi:10.20944/preprints202403.1074.v2), 2024-06-21
Supplement: Supplementary file 1 [file supplementary]

Archive with 7 entries (7 files):
- Supplemental_Materials/Basic_Prompts_for_using_explainer.pdf
- Supplemental_Materials/chatGPT_instructions.pdf
- Supplemental_Materials/data_matrices_Elongation_x=Casting_speed_y=Si_Fig3.txt
- Supplemental_Materials/data_matrices_Si_x=Ram_speed_y=Mn_fix=Yield_strength_Fig7.txt
- Supplemental_Materials/data_matrices_Yield_Strenght_x=Casting_speed_y=Si_Fig4.txt
- Supplemental_Materials/data_matrices_Yield_Strenght_x=Casting_speed_y=Si_fix=ram_speed_Fig5.txt
- Supplemental_Materials/data_matrices_Yield_Strenght_x=Casting_speed_y=Si_fix1=ram_speed_fax2=Mn_Fig6.txt
