# Supplementary material for: New Approach for Automated Explanation of Material Phenomena Using Artificial Neural Networks
Source: Preprints.org preprint supplement (doi:10.20944/preprints202403.1074.v2), 2024-06-21
Supplement: Supplementary file 1 [file supplementary › Supplemental_Materials/data_matrices_Elongation_x=Casting_speed_y=Si_Fig3.txt]

# Matrix: Prediction
11.874 11.874 11.875 11.878 11.883 11.892 11.906 11.919 11.928 11.932 11.934 11.936 11.938 11.942 11.949 11.957 11.965 11.971 11.976 11.979 11.981
11.875 11.876 11.877 11.879 11.884 11.892 11.905 11.917 11.925 11.929 11.930 11.932 11.935 11.940 11.947 11.956 11.965 11.973 11.978 11.982 11.984
11.878 11.878 11.879 11.881 11.885 11.893 11.904 11.914 11.921 11.924 11.926 11.928 11.931 11.937 11.945 11.956 11.967 11.975 11.982 11.986 11.989
11.882 11.882 11.883 11.885 11.888 11.894 11.903 11.911 11.917 11.919 11.921 11.923 11.926 11.933 11.943 11.956 11.969 11.979 11.987 11.992 11.996
11.887 11.888 11.888 11.889 11.892 11.896 11.902 11.908 11.911 11.913 11.914 11.917 11.921 11.929 11.941 11.956 11.972 11.985 11.994 12.000 12.005
11.895 11.895 11.895 11.895 11.896 11.898 11.901 11.903 11.905 11.906 11.907 11.910 11.915 11.924 11.939 11.957 11.976 11.991 12.002 12.010 12.015
11.903 11.903 11.903 11.902 11.902 11.901 11.899 11.898 11.897 11.897 11.898 11.901 11.907 11.918 11.936 11.958 11.980 11.998 12.012 12.022 12.028
11.912 11.912 11.911 11.910 11.908 11.903 11.897 11.892 11.889 11.888 11.889 11.892 11.899 11.912 11.932 11.958 11.984 12.006 12.023 12.034 12.042
11.922 11.921 11.920 11.918 11.913 11.905 11.894 11.885 11.879 11.877 11.877 11.881 11.889 11.904 11.928 11.958 11.989 12.015 12.034 12.048 12.056
11.931 11.930 11.928 11.925 11.918 11.907 11.891 11.876 11.868 11.865 11.865 11.869 11.878 11.895 11.923 11.957 11.993 12.023 12.046 12.061 12.072
11.939 11.938 11.936 11.932 11.923 11.907 11.886 11.867 11.855 11.851 11.851 11.856 11.866 11.886 11.916 11.956 11.996 12.031 12.057 12.075 12.086
11.947 11.945 11.942 11.937 11.925 11.906 11.879 11.856 11.842 11.836 11.836 11.841 11.853 11.875 11.909 11.953 11.999 12.038 12.067 12.088 12.101
11.952 11.951 11.947 11.940 11.927 11.903 11.872 11.844 11.827 11.821 11.821 11.826 11.839 11.863 11.901 11.950 12.001 12.044 12.077 12.100 12.114
11.956 11.954 11.950 11.942 11.927 11.900 11.863 11.831 11.812 11.804 11.804 11.810 11.824 11.850 11.893 11.946 12.002 12.050 12.086 12.111 12.127
11.958 11.956 11.952 11.943 11.925 11.895 11.854 11.817 11.796 11.787 11.787 11.793 11.808 11.837 11.883 11.942 12.003 12.055 12.094 12.121 12.139
11.959 11.957 11.952 11.942 11.922 11.889 11.843 11.803 11.779 11.770 11.770 11.776 11.793 11.824 11.874 11.937 12.003 12.059 12.101 12.130 12.149
11.958 11.956 11.950 11.940 11.919 11.882 11.833 11.789 11.763 11.753 11.752 11.759 11.777 11.811 11.864 11.932 12.003 12.063 12.108 12.139 12.159
11.956 11.954 11.948 11.937 11.914 11.875 11.822 11.775 11.746 11.735 11.735 11.742 11.761 11.798 11.855 11.928 12.002 12.066 12.114 12.147 12.169
11.954 11.951 11.945 11.933 11.910 11.868 11.812 11.761 11.730 11.719 11.718 11.726 11.746 11.785 11.846 11.923 12.002 12.070 12.120 12.154 12.177
11.951 11.948 11.942 11.930 11.905 11.862 11.802 11.748 11.715 11.702 11.701 11.710 11.732 11.773 11.837 11.919 12.002 12.073 12.126 12.162 12.185
11.947 11.944 11.938 11.926 11.900 11.856 11.793 11.735 11.700 11.686 11.685 11.695 11.718 11.761 11.829 11.915 12.003 12.076 12.131 12.169 12.193

# Matrix: Density
1.121 1.071 0.925 0.732 0.545 0.404 0.324 0.302 0.322 0.366 0.420 0.477 0.536 0.606 0.704 0.846 1.040 1.271 1.492 1.641 1.661
1.224 1.169 1.011 0.800 0.596 0.443 0.358 0.336 0.358 0.408 0.468 0.531 0.597 0.674 0.781 0.937 1.149 1.401 1.643 1.805 1.825
1.301 1.244 1.075 0.852 0.637 0.475 0.386 0.363 0.389 0.444 0.510 0.578 0.649 0.732 0.846 1.012 1.238 1.506 1.763 1.935 1.955
1.350 1.291 1.117 0.886 0.663 0.497 0.406 0.384 0.413 0.471 0.542 0.615 0.690 0.777 0.896 1.068 1.302 1.580 1.847 2.024 2.044
1.370 1.310 1.134 0.900 0.676 0.508 0.418 0.397 0.429 0.490 0.563 0.639 0.716 0.806 0.927 1.101 1.339 1.621 1.891 2.070 2.089
1.361 1.302 1.127 0.896 0.674 0.509 0.420 0.402 0.435 0.498 0.573 0.650 0.728 0.817 0.938 1.112 1.348 1.628 1.896 2.073 2.089
1.326 1.269 1.099 0.875 0.659 0.500 0.415 0.399 0.433 0.496 0.571 0.647 0.725 0.813 0.930 1.100 1.330 1.602 1.863 2.034 2.049
1.269 1.214 1.053 0.838 0.633 0.482 0.402 0.388 0.422 0.484 0.558 0.632 0.707 0.792 0.905 1.067 1.288 1.548 1.797 1.961 1.974
1.195 1.144 0.992 0.791 0.598 0.456 0.382 0.371 0.404 0.464 0.534 0.606 0.677 0.758 0.865 1.018 1.225 1.470 1.704 1.857 1.869
1.108 1.061 0.920 0.734 0.556 0.425 0.358 0.348 0.380 0.437 0.503 0.570 0.637 0.712 0.812 0.954 1.146 1.373 1.590 1.732 1.742
1.013 0.970 0.842 0.672 0.510 0.391 0.329 0.321 0.352 0.404 0.466 0.528 0.590 0.659 0.750 0.880 1.056 1.264 1.462 1.591 1.600
0.914 0.876 0.760 0.607 0.461 0.354 0.299 0.292 0.320 0.369 0.424 0.481 0.537 0.600 0.682 0.800 0.959 1.147 1.326 1.442 1.449
0.815 0.781 0.678 0.541 0.411 0.316 0.268 0.262 0.287 0.331 0.381 0.432 0.482 0.538 0.612 0.717 0.859 1.026 1.186 1.290 1.296
0.718 0.688 0.597 0.477 0.363 0.279 0.236 0.232 0.254 0.293 0.337 0.382 0.426 0.476 0.541 0.634 0.759 0.907 1.048 1.140 1.145
0.625 0.599 0.520 0.416 0.316 0.243 0.206 0.202 0.222 0.255 0.294 0.333 0.372 0.415 0.472 0.553 0.662 0.792 0.915 0.995 0.999
0.539 0.516 0.448 0.358 0.272 0.209 0.177 0.174 0.191 0.220 0.253 0.287 0.320 0.357 0.407 0.476 0.571 0.683 0.789 0.858 0.862
0.460 0.441 0.383 0.306 0.232 0.179 0.151 0.148 0.162 0.186 0.215 0.243 0.272 0.304 0.346 0.405 0.486 0.582 0.673 0.732 0.736
0.390 0.373 0.324 0.259 0.196 0.151 0.127 0.124 0.136 0.156 0.180 0.204 0.228 0.255 0.290 0.341 0.409 0.490 0.567 0.617 0.621
0.327 0.313 0.272 0.217 0.164 0.126 0.106 0.103 0.112 0.129 0.149 0.169 0.188 0.211 0.240 0.283 0.340 0.408 0.472 0.515 0.518
0.273 0.261 0.227 0.181 0.137 0.104 0.087 0.084 0.092 0.105 0.121 0.138 0.154 0.172 0.197 0.232 0.279 0.335 0.389 0.424 0.427
0.227 0.217 0.188 0.150 0.113 0.086 0.071 0.068 0.074 0.085 0.098 0.111 0.124 0.139 0.159 0.188 0.227 0.273 0.317 0.346 0.348

# Matrix: Standard Deviation
1.576 1.576 1.576 1.576 1.576 1.576 1.576 1.576 1.577 1.577 1.577 1.577 1.577 1.577 1.578 1.578 1.578 1.579 1.579 1.579 1.579
1.576 1.576 1.576 1.576 1.576 1.576 1.576 1.576 1.577 1.577 1.577 1.577 1.577 1.577 1.577 1.578 1.578 1.579 1.579 1.579 1.580
1.576 1.576 1.576 1.576 1.576 1.576 1.576 1.576 1.576 1.577 1.577 1.577 1.577 1.577 1.577 1.578 1.579 1.579 1.579 1.580 1.580
1.576 1.576 1.576 1.576 1.576 1.576 1.576 1.576 1.576 1.576 1.576 1.577 1.577 1.577 1.577 1.578 1.579 1.579 1.580 1.580 1.581
1.576 1.576 1.576 1.576 1.576 1.576 1.576 1.576 1.576 1.576 1.576 1.576 1.576 1.577 1.577 1.578 1.579 1.580 1.580 1.581 1.581
1.576 1.576 1.576 1.576 1.576 1.576 1.576 1.576 1.576 1.576 1.576 1.576 1.576 1.577 1.577 1.578 1.579 1.580 1.581 1.582 1.582
1.576 1.576 1.576 1.576 1.576 1.576 1.576 1.576 1.576 1.576 1.576 1.576 1.576 1.576 1.577 1.578 1.579 1.581 1.582 1.583 1.583
1.576 1.576 1.576 1.576 1.576 1.576 1.576 1.576 1.576 1.576 1.576 1.576 1.576 1.576 1.577 1.578 1.580 1.581 1.583 1.584 1.585
1.577 1.576 1.576 1.576 1.576 1.576 1.576 1.576 1.576 1.576 1.576 1.576 1.576 1.576 1.577 1.578 1.580 1.582 1.584 1.585 1.586
1.577 1.577 1.577 1.577 1.576 1.576 1.576 1.576 1.576 1.576 1.576 1.576 1.576 1.576 1.577 1.578 1.580 1.583 1.585 1.587 1.588
1.577 1.577 1.577 1.577 1.577 1.576 1.576 1.576 1.576 1.576 1.576 1.576 1.576 1.576 1.576 1.578 1.581 1.584 1.586 1.589 1.590
1.577 1.577 1.577 1.577 1.577 1.576 1.576 1.576 1.576 1.576 1.576 1.576 1.576 1.576 1.576 1.578 1.581 1.584 1.588 1.590 1.592
1.578 1.578 1.577 1.577 1.577 1.576 1.576 1.576 1.576 1.577 1.577 1.577 1.576 1.576 1.576 1.578 1.581 1.585 1.589 1.592 1.594
1.578 1.578 1.578 1.577 1.577 1.576 1.576 1.576 1.577 1.577 1.577 1.577 1.577 1.576 1.576 1.577 1.581 1.586 1.590 1.594 1.596
1.578 1.578 1.578 1.577 1.577 1.576 1.576 1.577 1.578 1.578 1.578 1.578 1.577 1.576 1.576 1.577 1.581 1.586 1.591 1.595 1.598
1.578 1.578 1.578 1.577 1.577 1.576 1.576 1.577 1.579 1.579 1.579 1.579 1.578 1.577 1.576 1.577 1.581 1.587 1.592 1.597 1.600
1.578 1.578 1.578 1.577 1.576 1.576 1.576 1.578 1.580 1.580 1.580 1.580 1.579 1.577 1.576 1.577 1.581 1.587 1.593 1.598 1.601
1.578 1.578 1.578 1.577 1.576 1.576 1.577 1.579 1.581 1.582 1.582 1.581 1.580 1.578 1.576 1.577 1.581 1.588 1.594 1.599 1.603
1.578 1.578 1.577 1.577 1.576 1.576 1.577 1.580 1.582 1.583 1.583 1.583 1.581 1.578 1.576 1.577 1.581 1.588 1.595 1.601 1.605
1.578 1.578 1.577 1.577 1.576 1.576 1.577 1.581 1.584 1.585 1.585 1.584 1.582 1.579 1.576 1.576 1.581 1.588 1.596 1.602 1.606
1.578 1.577 1.577 1.577 1.576 1.576 1.578 1.582 1.585 1.587 1.587 1.586 1.583 1.580 1.576 1.576 1.581 1.589 1.597 1.603 1.608
