# Supplementary material for: New Approach for Automated Explanation of Material Phenomena Using Artificial Neural Networks
Source: Preprints.org preprint supplement (doi:10.20944/preprints202403.1074.v2), 2024-06-21
Supplement: Supplementary file 1 [file supplementary › Supplemental_Materials/data_matrices_Si_x=Ram_speed_y=Mn_fix=Yield_strength_Fig7.txt]

# Matrix: Prediction
0.885 0.884 0.883 0.882 0.881 0.881 0.880 0.880 0.880 0.880 0.880 0.881 0.882 0.884 0.885 0.888 0.890 0.892 0.893 0.894 0.895
0.883 0.883 0.882 0.881 0.880 0.880 0.879 0.879 0.879 0.879 0.880 0.881 0.882 0.883 0.885 0.888 0.890 0.892 0.894 0.895 0.896
0.882 0.881 0.881 0.880 0.879 0.879 0.879 0.879 0.879 0.879 0.879 0.880 0.881 0.883 0.885 0.888 0.891 0.893 0.895 0.897 0.898
0.881 0.880 0.880 0.879 0.879 0.879 0.878 0.878 0.878 0.879 0.879 0.880 0.881 0.883 0.885 0.888 0.891 0.894 0.896 0.898 0.899
0.880 0.879 0.879 0.879 0.878 0.878 0.878 0.878 0.878 0.879 0.879 0.880 0.881 0.883 0.885 0.889 0.892 0.895 0.898 0.900 0.901
0.879 0.879 0.879 0.879 0.878 0.878 0.878 0.878 0.878 0.879 0.879 0.880 0.881 0.883 0.886 0.889 0.893 0.896 0.899 0.901 0.903
0.880 0.879 0.879 0.879 0.879 0.878 0.878 0.878 0.878 0.879 0.879 0.880 0.881 0.883 0.886 0.890 0.894 0.897 0.901 0.903 0.905
0.880 0.880 0.879 0.879 0.879 0.879 0.879 0.879 0.879 0.879 0.879 0.880 0.881 0.883 0.886 0.890 0.894 0.899 0.902 0.905 0.906
0.881 0.880 0.880 0.880 0.880 0.879 0.879 0.879 0.879 0.879 0.880 0.880 0.881 0.883 0.886 0.891 0.895 0.900 0.903 0.906 0.908
0.882 0.881 0.881 0.881 0.881 0.880 0.880 0.880 0.880 0.880 0.880 0.880 0.882 0.884 0.887 0.891 0.896 0.901 0.905 0.908 0.910
0.883 0.883 0.882 0.882 0.881 0.881 0.881 0.881 0.880 0.880 0.880 0.881 0.882 0.884 0.887 0.891 0.897 0.902 0.906 0.909 0.911
0.884 0.884 0.883 0.883 0.883 0.882 0.882 0.881 0.881 0.881 0.881 0.881 0.882 0.884 0.887 0.892 0.897 0.903 0.907 0.910 0.913
0.886 0.885 0.885 0.884 0.884 0.883 0.883 0.882 0.882 0.882 0.881 0.882 0.882 0.884 0.888 0.892 0.898 0.903 0.908 0.911 0.914
0.887 0.887 0.886 0.885 0.885 0.884 0.884 0.883 0.883 0.882 0.882 0.882 0.883 0.885 0.888 0.893 0.898 0.904 0.909 0.912 0.915
0.889 0.888 0.888 0.887 0.886 0.885 0.885 0.884 0.883 0.883 0.883 0.883 0.883 0.885 0.888 0.893 0.898 0.904 0.909 0.913 0.916
0.890 0.890 0.889 0.888 0.887 0.887 0.886 0.885 0.884 0.884 0.883 0.883 0.883 0.885 0.888 0.893 0.899 0.905 0.910 0.914 0.917
0.892 0.891 0.890 0.890 0.889 0.888 0.887 0.886 0.885 0.884 0.884 0.883 0.884 0.885 0.888 0.893 0.899 0.905 0.910 0.914 0.917
0.894 0.893 0.892 0.891 0.890 0.889 0.888 0.887 0.886 0.885 0.884 0.884 0.884 0.885 0.888 0.892 0.898 0.905 0.910 0.914 0.918
0.895 0.895 0.894 0.892 0.891 0.890 0.889 0.888 0.887 0.886 0.885 0.884 0.884 0.885 0.887 0.892 0.898 0.904 0.910 0.914 0.918
0.897 0.896 0.895 0.894 0.893 0.891 0.890 0.889 0.888 0.886 0.885 0.884 0.884 0.885 0.887 0.891 0.897 0.904 0.909 0.914 0.917
0.899 0.898 0.897 0.895 0.894 0.893 0.891 0.890 0.889 0.887 0.886 0.885 0.884 0.885 0.887 0.891 0.897 0.903 0.909 0.913 0.917

# Matrix: Density
0.743 0.851 0.942 1.011 1.056 1.076 1.074 1.051 1.014 0.965 0.911 0.857 0.811 0.781 0.775 0.800 0.859 0.944 1.038 1.111 1.136
0.877 1.004 1.111 1.193 1.245 1.268 1.264 1.236 1.190 1.132 1.067 1.002 0.947 0.911 0.904 0.934 1.003 1.105 1.216 1.304 1.335
1.015 1.162 1.285 1.378 1.437 1.463 1.456 1.423 1.369 1.299 1.223 1.148 1.083 1.040 1.031 1.066 1.147 1.264 1.394 1.497 1.535
1.153 1.319 1.458 1.562 1.628 1.655 1.646 1.606 1.542 1.462 1.374 1.288 1.214 1.164 1.154 1.193 1.284 1.418 1.566 1.685 1.729
1.286 1.470 1.624 1.738 1.809 1.837 1.825 1.779 1.706 1.615 1.515 1.418 1.334 1.279 1.266 1.309 1.410 1.560 1.725 1.858 1.910
1.411 1.611 1.777 1.901 1.976 2.004 1.989 1.936 1.853 1.752 1.641 1.533 1.441 1.379 1.365 1.410 1.521 1.684 1.865 2.012 2.070
1.521 1.736 1.913 2.044 2.123 2.150 2.131 2.071 1.980 1.869 1.748 1.631 1.530 1.463 1.446 1.494 1.612 1.786 1.981 2.140 2.204
1.615 1.841 2.027 2.163 2.244 2.270 2.246 2.180 2.082 1.962 1.833 1.707 1.599 1.526 1.507 1.557 1.680 1.863 2.068 2.236 2.306
1.687 1.922 2.114 2.253 2.334 2.358 2.331 2.259 2.154 2.027 1.891 1.759 1.645 1.568 1.547 1.596 1.723 1.912 2.124 2.299 2.372
1.736 1.974 2.169 2.310 2.390 2.412 2.381 2.305 2.195 2.063 1.922 1.785 1.668 1.587 1.564 1.612 1.739 1.931 2.146 2.324 2.400
1.757 1.997 2.192 2.331 2.410 2.430 2.395 2.316 2.203 2.068 1.924 1.785 1.665 1.583 1.557 1.604 1.730 1.920 2.134 2.313 2.389
1.751 1.989 2.181 2.317 2.392 2.409 2.372 2.292 2.178 2.042 1.898 1.758 1.638 1.555 1.528 1.572 1.694 1.880 2.090 2.265 2.341
1.718 1.949 2.135 2.266 2.337 2.351 2.313 2.232 2.119 1.985 1.843 1.706 1.588 1.506 1.477 1.518 1.635 1.813 2.015 2.184 2.257
1.658 1.879 2.056 2.180 2.247 2.258 2.220 2.140 2.030 1.900 1.763 1.630 1.516 1.436 1.408 1.445 1.554 1.722 1.914 2.074 2.143
1.574 1.782 1.949 2.064 2.125 2.134 2.096 2.019 1.914 1.790 1.660 1.534 1.426 1.350 1.322 1.356 1.456 1.612 1.790 1.939 2.002
1.469 1.663 1.816 1.922 1.977 1.983 1.946 1.874 1.775 1.660 1.538 1.421 1.321 1.250 1.223 1.253 1.345 1.487 1.649 1.785 1.842
1.349 1.525 1.664 1.759 1.808 1.813 1.777 1.710 1.619 1.513 1.403 1.296 1.204 1.140 1.115 1.142 1.224 1.351 1.497 1.618 1.669
1.218 1.375 1.499 1.583 1.626 1.628 1.596 1.534 1.452 1.357 1.258 1.163 1.081 1.024 1.002 1.025 1.098 1.211 1.339 1.446 1.489
1.080 1.219 1.327 1.401 1.437 1.438 1.408 1.353 1.281 1.197 1.110 1.027 0.956 0.906 0.887 0.908 0.971 1.069 1.181 1.272 1.309
0.941 1.061 1.155 1.217 1.248 1.248 1.221 1.173 1.110 1.038 0.963 0.892 0.832 0.790 0.775 0.793 0.848 0.932 1.026 1.104 1.134
0.806 0.908 0.987 1.040 1.065 1.064 1.040 0.999 0.946 0.885 0.823 0.763 0.713 0.679 0.667 0.684 0.730 0.801 0.880 0.944 0.968

# Matrix: Standard Deviation
0.081 0.081 0.081 0.081 0.081 0.081 0.081 0.081 0.081 0.081 0.081 0.081 0.081 0.081 0.081 0.081 0.081 0.081 0.081 0.081 0.081
0.081 0.081 0.081 0.081 0.081 0.081 0.081 0.081 0.081 0.081 0.081 0.081 0.081 0.081 0.081 0.081 0.081 0.081 0.081 0.082 0.082
0.081 0.081 0.081 0.081 0.081 0.081 0.081 0.081 0.081 0.081 0.081 0.081 0.081 0.081 0.081 0.081 0.081 0.081 0.081 0.082 0.082
0.081 0.081 0.081 0.081 0.081 0.081 0.081 0.081 0.081 0.081 0.081 0.081 0.081 0.081 0.081 0.081 0.081 0.081 0.082 0.082 0.082
0.081 0.081 0.081 0.081 0.081 0.081 0.081 0.081 0.081 0.081 0.081 0.081 0.081 0.081 0.081 0.081 0.081 0.081 0.082 0.082 0.082
0.081 0.081 0.081 0.081 0.081 0.081 0.081 0.081 0.081 0.081 0.081 0.081 0.081 0.081 0.081 0.081 0.081 0.082 0.082 0.082 0.083
0.081 0.081 0.081 0.081 0.081 0.081 0.081 0.081 0.081 0.081 0.081 0.081 0.081 0.081 0.081 0.081 0.081 0.082 0.082 0.083 0.083
0.081 0.081 0.081 0.081 0.081 0.081 0.081 0.081 0.081 0.081 0.081 0.081 0.081 0.081 0.081 0.081 0.081 0.082 0.083 0.083 0.084
0.081 0.081 0.081 0.081 0.081 0.081 0.081 0.081 0.081 0.081 0.081 0.081 0.081 0.081 0.081 0.081 0.081 0.082 0.083 0.084 0.084
0.081 0.081 0.081 0.081 0.081 0.081 0.081 0.081 0.081 0.081 0.081 0.081 0.081 0.081 0.081 0.081 0.082 0.082 0.083 0.084 0.085
0.081 0.081 0.081 0.081 0.081 0.081 0.081 0.081 0.081 0.081 0.081 0.081 0.081 0.081 0.081 0.081 0.082 0.083 0.083 0.084 0.085
0.081 0.081 0.081 0.081 0.081 0.081 0.081 0.081 0.081 0.081 0.081 0.081 0.081 0.081 0.081 0.081 0.082 0.083 0.084 0.085 0.085
0.081 0.081 0.081 0.081 0.081 0.081 0.081 0.081 0.081 0.081 0.081 0.081 0.081 0.081 0.081 0.081 0.082 0.083 0.084 0.085 0.086
0.081 0.081 0.081 0.081 0.081 0.081 0.081 0.081 0.081 0.081 0.081 0.081 0.081 0.081 0.081 0.081 0.082 0.083 0.084 0.085 0.086
0.081 0.081 0.081 0.081 0.081 0.081 0.081 0.081 0.081 0.081 0.081 0.081 0.081 0.081 0.081 0.081 0.082 0.083 0.084 0.086 0.087
0.081 0.081 0.081 0.081 0.081 0.081 0.081 0.081 0.081 0.081 0.081 0.081 0.081 0.081 0.081 0.081 0.082 0.083 0.085 0.086 0.087
0.081 0.081 0.081 0.081 0.081 0.081 0.081 0.081 0.081 0.081 0.081 0.081 0.081 0.081 0.081 0.081 0.082 0.083 0.085 0.086 0.087
0.081 0.081 0.081 0.081 0.081 0.081 0.081 0.081 0.081 0.081 0.081 0.081 0.081 0.081 0.081 0.081 0.082 0.083 0.085 0.086 0.087
0.082 0.081 0.081 0.081 0.081 0.081 0.081 0.081 0.081 0.081 0.081 0.081 0.081 0.081 0.081 0.081 0.082 0.083 0.085 0.086 0.087
0.082 0.082 0.081 0.081 0.081 0.081 0.081 0.081 0.081 0.081 0.081 0.081 0.081 0.081 0.081 0.081 0.082 0.083 0.084 0.086 0.087
0.082 0.082 0.082 0.082 0.081 0.081 0.081 0.081 0.081 0.081 0.081 0.081 0.081 0.081 0.081 0.081 0.082 0.083 0.084 0.086 0.087
