# Supplementary material for: New Approach for Automated Explanation of Material Phenomena Using Artificial Neural Networks
Source: Preprints.org preprint supplement (doi:10.20944/preprints202403.1074.v2), 2024-06-21
Supplement: Supplementary file 1 [file supplementary › Supplemental_Materials/data_matrices_Yield_Strenght_x=Casting_speed_y=Si_Fig4.txt]

# Matrix: Prediction
316.093 316.130 316.204 316.357 316.668 317.243 318.086 318.924 319.462 319.700 319.772 319.760 319.682 319.527 319.288 318.995 318.708 318.474 318.304 318.190 318.117
316.289 316.327 316.403 316.559 316.875 317.457 318.302 319.135 319.665 319.899 319.969 319.955 319.876 319.719 319.475 319.176 318.882 318.640 318.464 318.346 318.269
316.518 316.557 316.635 316.795 317.118 317.709 318.559 319.389 319.912 320.142 320.210 320.195 320.115 319.955 319.707 319.400 319.096 318.845 318.663 318.540 318.460
316.776 316.816 316.897 317.061 317.393 317.997 318.857 319.686 320.204 320.430 320.497 320.481 320.399 320.236 319.981 319.666 319.351 319.090 318.899 318.770 318.686
317.060 317.102 317.185 317.356 317.698 318.318 319.191 320.024 320.541 320.765 320.830 320.813 320.729 320.561 320.299 319.973 319.645 319.372 319.171 319.035 318.946
317.366 317.409 317.496 317.674 318.029 318.668 319.562 320.404 320.922 321.145 321.209 321.191 321.104 320.930 320.659 320.318 319.974 319.686 319.473 319.328 319.234
317.688 317.734 317.825 318.011 318.383 319.046 319.965 320.822 321.345 321.570 321.633 321.614 321.523 321.341 321.056 320.697 320.333 320.026 319.798 319.643 319.541
318.025 318.074 318.170 318.365 318.755 319.446 320.397 321.277 321.809 322.036 322.100 322.078 321.982 321.789 321.487 321.104 320.714 320.384 320.138 319.970 319.860
318.374 318.425 318.526 318.733 319.143 319.867 320.856 321.763 322.309 322.540 322.605 322.580 322.476 322.270 321.945 321.532 321.110 320.751 320.484 320.300 320.179
318.734 318.788 318.895 319.113 319.545 320.305 321.337 322.277 322.839 323.077 323.141 323.113 323.000 322.777 322.424 321.974 321.512 321.118 320.824 320.622 320.489
319.106 319.163 319.276 319.506 319.961 320.759 321.836 322.811 323.393 323.637 323.703 323.670 323.546 323.302 322.915 322.421 321.912 321.477 321.152 320.927 320.779
319.494 319.554 319.673 319.914 320.391 321.226 322.348 323.361 323.962 324.214 324.279 324.242 324.105 323.836 323.410 322.864 322.301 321.819 321.458 321.208 321.044
319.902 319.965 320.089 320.341 320.838 321.707 322.871 323.918 324.538 324.797 324.862 324.818 324.667 324.370 323.899 323.295 322.672 322.137 321.736 321.459 321.277
320.338 320.403 320.532 320.792 321.305 322.201 323.400 324.475 325.111 325.376 325.440 325.389 325.222 324.894 324.373 323.707 323.018 322.427 321.984 321.677 321.475
320.810 320.876 321.007 321.272 321.796 322.710 323.931 325.027 325.673 325.941 326.004 325.946 325.761 325.399 324.826 324.092 323.334 322.684 322.197 321.860 321.638
321.325 321.391 321.522 321.789 322.315 323.234 324.462 325.565 326.217 326.486 326.546 326.479 326.275 325.878 325.250 324.447 323.618 322.907 322.374 322.007 321.764
321.892 321.957 322.087 322.350 322.869 323.776 324.993 326.088 326.735 327.001 327.057 326.981 326.758 326.324 325.640 324.765 323.864 323.094 322.516 322.118 321.856
322.523 322.586 322.711 322.964 323.464 324.342 325.523 326.591 327.224 327.484 327.534 327.447 327.204 326.733 325.991 325.045 324.073 323.243 322.623 322.195 321.914
323.229 323.288 323.404 323.641 324.111 324.937 326.057 327.076 327.682 327.930 327.972 327.875 327.611 327.102 326.302 325.285 324.243 323.355 322.694 322.239 321.940
324.028 324.081 324.186 324.399 324.823 325.574 326.600 327.544 328.110 328.339 328.371 328.262 327.976 327.429 326.570 325.482 324.372 323.430 322.730 322.249 321.934
324.945 324.990 325.079 325.260 325.623 326.270 327.167 328.004 328.509 328.712 328.732 328.610 328.301 327.714 326.796 325.637 324.460 323.466 322.730 322.226 321.895

# Matrix: Density
1.121 1.071 0.925 0.732 0.545 0.404 0.324 0.302 0.322 0.366 0.420 0.477 0.536 0.606 0.704 0.846 1.040 1.271 1.492 1.641 1.661
1.224 1.169 1.011 0.800 0.596 0.443 0.358 0.336 0.358 0.408 0.468 0.531 0.597 0.674 0.781 0.937 1.149 1.401 1.643 1.805 1.825
1.301 1.244 1.075 0.852 0.637 0.475 0.386 0.363 0.389 0.444 0.510 0.578 0.649 0.732 0.846 1.012 1.238 1.506 1.763 1.935 1.955
1.350 1.291 1.117 0.886 0.663 0.497 0.406 0.384 0.413 0.471 0.542 0.615 0.690 0.777 0.896 1.068 1.302 1.580 1.847 2.024 2.044
1.370 1.310 1.134 0.900 0.676 0.508 0.418 0.397 0.429 0.490 0.563 0.639 0.716 0.806 0.927 1.101 1.339 1.621 1.891 2.070 2.089
1.361 1.302 1.127 0.896 0.674 0.509 0.420 0.402 0.435 0.498 0.573 0.650 0.728 0.817 0.938 1.112 1.348 1.628 1.896 2.073 2.089
1.326 1.269 1.099 0.875 0.659 0.500 0.415 0.399 0.433 0.496 0.571 0.647 0.725 0.813 0.930 1.100 1.330 1.602 1.863 2.034 2.049
1.269 1.214 1.053 0.838 0.633 0.482 0.402 0.388 0.422 0.484 0.558 0.632 0.707 0.792 0.905 1.067 1.288 1.548 1.797 1.961 1.974
1.195 1.144 0.992 0.791 0.598 0.456 0.382 0.371 0.404 0.464 0.534 0.606 0.677 0.758 0.865 1.018 1.225 1.470 1.704 1.857 1.869
1.108 1.061 0.920 0.734 0.556 0.425 0.358 0.348 0.380 0.437 0.503 0.570 0.637 0.712 0.812 0.954 1.146 1.373 1.590 1.732 1.742
1.013 0.970 0.842 0.672 0.510 0.391 0.329 0.321 0.352 0.404 0.466 0.528 0.590 0.659 0.750 0.880 1.056 1.264 1.462 1.591 1.600
0.914 0.876 0.760 0.607 0.461 0.354 0.299 0.292 0.320 0.369 0.424 0.481 0.537 0.600 0.682 0.800 0.959 1.147 1.326 1.442 1.449
0.815 0.781 0.678 0.541 0.411 0.316 0.268 0.262 0.287 0.331 0.381 0.432 0.482 0.538 0.612 0.717 0.859 1.026 1.186 1.290 1.296
0.718 0.688 0.597 0.477 0.363 0.279 0.236 0.232 0.254 0.293 0.337 0.382 0.426 0.476 0.541 0.634 0.759 0.907 1.048 1.140 1.145
0.625 0.599 0.520 0.416 0.316 0.243 0.206 0.202 0.222 0.255 0.294 0.333 0.372 0.415 0.472 0.553 0.662 0.792 0.915 0.995 0.999
0.539 0.516 0.448 0.358 0.272 0.209 0.177 0.174 0.191 0.220 0.253 0.287 0.320 0.357 0.407 0.476 0.571 0.683 0.789 0.858 0.862
0.460 0.441 0.383 0.306 0.232 0.179 0.151 0.148 0.162 0.186 0.215 0.243 0.272 0.304 0.346 0.405 0.486 0.582 0.673 0.732 0.736
0.390 0.373 0.324 0.259 0.196 0.151 0.127 0.124 0.136 0.156 0.180 0.204 0.228 0.255 0.290 0.341 0.409 0.490 0.567 0.617 0.621
0.327 0.313 0.272 0.217 0.164 0.126 0.106 0.103 0.112 0.129 0.149 0.169 0.188 0.211 0.240 0.283 0.340 0.408 0.472 0.515 0.518
0.273 0.261 0.227 0.181 0.137 0.104 0.087 0.084 0.092 0.105 0.121 0.138 0.154 0.172 0.197 0.232 0.279 0.335 0.389 0.424 0.427
0.227 0.217 0.188 0.150 0.113 0.086 0.071 0.068 0.074 0.085 0.098 0.111 0.124 0.139 0.159 0.188 0.227 0.273 0.317 0.346 0.348

# Matrix: Standard Deviation
20.225 20.225 20.226 20.227 20.234 20.258 20.323 20.423 20.504 20.545 20.557 20.555 20.541 20.515 20.476 20.433 20.394 20.365 20.346 20.334 20.326
20.226 20.227 20.228 20.231 20.241 20.271 20.346 20.453 20.538 20.580 20.593 20.591 20.576 20.548 20.506 20.459 20.417 20.385 20.364 20.351 20.342
20.230 20.231 20.233 20.238 20.251 20.290 20.375 20.492 20.583 20.627 20.640 20.637 20.621 20.591 20.546 20.494 20.447 20.412 20.388 20.373 20.363
20.237 20.238 20.241 20.249 20.267 20.315 20.413 20.542 20.639 20.685 20.699 20.696 20.679 20.645 20.596 20.539 20.486 20.446 20.419 20.402 20.391
20.249 20.251 20.255 20.265 20.289 20.347 20.461 20.604 20.709 20.758 20.773 20.769 20.750 20.713 20.658 20.594 20.535 20.489 20.458 20.438 20.426
20.265 20.268 20.274 20.287 20.318 20.389 20.521 20.680 20.794 20.847 20.863 20.858 20.837 20.796 20.734 20.662 20.594 20.542 20.506 20.483 20.468
20.288 20.292 20.299 20.316 20.355 20.440 20.593 20.771 20.896 20.954 20.971 20.965 20.942 20.895 20.825 20.743 20.665 20.604 20.562 20.535 20.517
20.318 20.322 20.332 20.353 20.400 20.502 20.678 20.879 21.018 21.081 21.099 21.092 21.065 21.012 20.932 20.837 20.747 20.676 20.626 20.594 20.573
20.354 20.359 20.371 20.397 20.454 20.575 20.779 21.005 21.159 21.228 21.248 21.240 21.209 21.148 21.055 20.944 20.838 20.755 20.697 20.658 20.634
20.397 20.404 20.419 20.450 20.518 20.659 20.894 21.150 21.321 21.397 21.418 21.409 21.372 21.301 21.193 21.063 20.939 20.840 20.771 20.726 20.698
20.449 20.457 20.474 20.511 20.592 20.757 21.025 21.312 21.502 21.587 21.610 21.598 21.555 21.472 21.345 21.192 21.046 20.930 20.848 20.795 20.761
20.509 20.519 20.540 20.583 20.677 20.867 21.171 21.492 21.702 21.795 21.819 21.805 21.755 21.657 21.508 21.329 21.157 21.020 20.925 20.862 20.823
20.581 20.593 20.616 20.667 20.775 20.990 21.331 21.686 21.918 22.019 22.045 22.027 21.968 21.853 21.679 21.469 21.268 21.109 20.998 20.925 20.879
20.666 20.680 20.707 20.764 20.886 21.128 21.505 21.894 22.145 22.254 22.281 22.260 22.190 22.057 21.855 21.611 21.378 21.194 21.066 20.982 20.929
20.768 20.783 20.814 20.878 21.014 21.280 21.691 22.111 22.380 22.496 22.523 22.498 22.417 22.264 22.030 21.750 21.483 21.272 21.126 21.032 20.972
20.891 20.908 20.942 21.012 21.161 21.449 21.889 22.334 22.618 22.739 22.767 22.736 22.644 22.468 22.202 21.883 21.580 21.342 21.178 21.072 21.006
21.040 21.059 21.095 21.171 21.330 21.636 22.097 22.560 22.854 22.980 23.006 22.970 22.865 22.666 22.366 22.006 21.667 21.403 21.221 21.104 21.031
21.223 21.242 21.281 21.361 21.527 21.843 22.316 22.788 23.086 23.213 23.237 23.195 23.076 22.854 22.518 22.118 21.743 21.452 21.253 21.126 21.047
21.447 21.467 21.506 21.588 21.757 22.075 22.547 23.015 23.311 23.435 23.456 23.407 23.275 23.028 22.656 22.216 21.806 21.490 21.275 21.139 21.054
21.727 21.746 21.785 21.865 22.029 22.337 22.792 23.242 23.526 23.644 23.661 23.604 23.458 23.186 22.778 22.299 21.854 21.515 21.286 21.142 21.052
22.078 22.096 22.132 22.206 22.358 22.642 23.059 23.472 23.733 23.839 23.850 23.785 23.624 23.326 22.883 22.364 21.888 21.528 21.287 21.135 21.041
