# Supplementary material for: New Approach for Automated Explanation of Material Phenomena Using Artificial Neural Networks
Source: Preprints.org preprint supplement (doi:10.20944/preprints202403.1074.v2), 2024-06-21
Supplement: Supplementary file 1 [file supplementary › Supplemental_Materials/data_matrices_Yield_Strenght_x=Casting_speed_y=Si_fix1=ram_speed_fax2=Mn_Fig6.txt]

# Matrix: Prediction
320.596 320.537 320.418 320.174 319.688 318.815 317.596 316.451 315.752 315.466 315.424 315.559 315.914 316.599 317.688 319.093 320.556 321.821 322.777 323.440 323.879
320.791 320.731 320.610 320.365 319.875 318.998 317.777 316.634 315.939 315.654 315.610 315.738 316.078 316.737 317.786 319.145 320.567 321.802 322.737 323.388 323.820
321.022 320.961 320.840 320.593 320.101 319.220 317.999 316.860 316.170 315.886 315.840 315.960 316.285 316.913 317.918 319.225 320.598 321.797 322.708 323.344 323.766
321.285 321.224 321.102 320.854 320.360 319.479 318.261 317.130 316.446 316.164 316.116 316.228 316.535 317.131 318.088 319.336 320.656 321.812 322.695 323.313 323.723
321.574 321.513 321.391 321.143 320.650 319.771 318.562 317.442 316.767 316.489 316.438 316.543 316.831 317.393 318.298 319.484 320.744 321.853 322.703 323.299 323.697
321.883 321.822 321.701 321.455 320.965 320.095 318.900 317.797 317.134 316.859 316.808 316.904 317.173 317.701 318.551 319.671 320.866 321.922 322.735 323.307 323.688
322.205 322.145 322.026 321.783 321.301 320.445 319.273 318.194 317.545 317.276 317.223 317.311 317.562 318.053 318.848 319.898 321.023 322.022 322.793 323.337 323.701
322.533 322.475 322.358 322.121 321.651 320.817 319.677 318.629 317.999 317.738 317.684 317.764 317.995 318.449 319.187 320.164 321.214 322.151 322.877 323.390 323.733
322.860 322.804 322.691 322.463 322.009 321.206 320.108 319.099 318.493 318.241 318.188 318.259 318.471 318.888 319.566 320.467 321.439 322.309 322.984 323.462 323.783
323.179 323.126 323.019 322.802 322.370 321.606 320.562 319.601 319.024 318.784 318.731 318.794 318.986 319.365 319.981 320.803 321.692 322.490 323.111 323.552 323.847
323.486 323.435 323.336 323.132 322.728 322.012 321.031 320.129 319.586 319.360 319.308 319.364 319.535 319.874 320.428 321.168 321.970 322.691 323.253 323.653 323.922
323.774 323.728 323.636 323.449 323.077 322.417 321.512 320.677 320.174 319.963 319.913 319.961 320.112 320.411 320.900 321.554 322.265 322.905 323.405 323.761 324.000
324.040 323.999 323.916 323.747 323.412 322.816 321.996 321.237 320.779 320.586 320.539 320.579 320.709 320.967 321.389 321.955 322.570 323.126 323.560 323.870 324.078
324.283 324.247 324.174 324.026 323.730 323.204 322.477 321.802 321.393 321.220 321.177 321.209 321.318 321.534 321.888 322.363 322.880 323.348 323.714 323.975 324.151
324.503 324.472 324.409 324.283 324.029 323.577 322.950 322.365 322.009 321.858 321.819 321.843 321.930 322.103 322.388 322.771 323.188 323.565 323.860 324.071 324.213
324.700 324.675 324.623 324.518 324.308 323.932 323.409 322.917 322.617 322.489 322.454 322.471 322.535 322.667 322.882 323.170 323.485 323.770 323.993 324.153 324.260
324.879 324.859 324.818 324.735 324.568 324.268 323.849 323.453 323.210 323.105 323.075 323.084 323.127 323.215 323.360 323.555 323.767 323.959 324.110 324.217 324.290
325.044 325.029 324.999 324.936 324.812 324.586 324.269 323.967 323.780 323.698 323.673 323.674 323.696 323.742 323.817 323.918 324.028 324.128 324.206 324.262 324.299
325.203 325.192 325.172 325.129 325.043 324.887 324.666 324.454 324.322 324.263 324.242 324.236 324.236 324.240 324.246 324.254 324.264 324.272 324.279 324.283 324.287
325.364 325.357 325.345 325.320 325.269 325.175 325.042 324.913 324.832 324.794 324.777 324.764 324.743 324.705 324.643 324.560 324.470 324.389 324.326 324.280 324.250
325.538 325.536 325.530 325.520 325.498 325.458 325.401 325.344 325.308 325.289 325.275 325.254 325.212 325.133 325.004 324.832 324.646 324.477 324.345 324.252 324.189

# Matrix: Density
2.124 2.032 1.760 1.399 1.052 0.795 0.658 0.630 0.682 0.780 0.896 1.015 1.132 1.260 1.428 1.666 1.987 2.365 2.725 2.958 2.968
2.339 2.238 1.938 1.541 1.161 0.878 0.728 0.698 0.757 0.866 0.995 1.126 1.256 1.397 1.580 1.839 2.189 2.601 2.992 3.245 3.253
2.510 2.402 2.081 1.656 1.248 0.946 0.785 0.755 0.819 0.938 1.078 1.219 1.358 1.510 1.705 1.980 2.350 2.787 3.201 3.467 3.474
2.629 2.516 2.180 1.735 1.309 0.993 0.826 0.796 0.865 0.991 1.139 1.288 1.434 1.592 1.795 2.078 2.461 2.912 3.339 3.613 3.617
2.690 2.574 2.231 1.776 1.341 1.019 0.849 0.819 0.891 1.022 1.174 1.328 1.478 1.639 1.844 2.130 2.517 2.971 3.401 3.676 3.677
2.691 2.575 2.232 1.778 1.343 1.022 0.853 0.824 0.898 1.029 1.183 1.337 1.487 1.648 1.851 2.134 2.515 2.962 3.386 3.655 3.653
2.635 2.522 2.187 1.742 1.317 1.003 0.838 0.811 0.883 1.013 1.165 1.317 1.463 1.620 1.816 2.090 2.457 2.890 3.298 3.556 3.552
2.529 2.421 2.099 1.673 1.265 0.964 0.806 0.781 0.851 0.976 1.122 1.268 1.409 1.558 1.745 2.004 2.351 2.760 3.146 3.388 3.383
2.382 2.280 1.977 1.575 1.191 0.908 0.760 0.736 0.802 0.920 1.058 1.196 1.328 1.467 1.641 1.882 2.204 2.583 2.941 3.165 3.158
2.202 2.108 1.828 1.457 1.101 0.840 0.702 0.680 0.742 0.851 0.978 1.105 1.227 1.354 1.513 1.733 2.027 2.372 2.698 2.902 2.893
2.002 1.916 1.661 1.324 1.000 0.762 0.638 0.617 0.672 0.771 0.886 1.001 1.111 1.226 1.369 1.566 1.830 2.139 2.430 2.612 2.604
1.790 1.713 1.485 1.183 0.894 0.681 0.568 0.550 0.599 0.686 0.789 0.891 0.988 1.090 1.217 1.390 1.622 1.895 2.151 2.311 2.303
1.575 1.508 1.307 1.041 0.786 0.598 0.498 0.481 0.524 0.600 0.690 0.779 0.864 0.953 1.062 1.213 1.415 1.651 1.873 2.012 2.004
1.366 1.307 1.133 0.902 0.680 0.517 0.430 0.415 0.451 0.516 0.593 0.670 0.743 0.819 0.913 1.042 1.214 1.416 1.606 1.724 1.717
1.168 1.118 0.969 0.771 0.581 0.440 0.366 0.352 0.382 0.437 0.502 0.567 0.628 0.693 0.772 0.880 1.026 1.196 1.356 1.456 1.449
0.986 0.943 0.817 0.650 0.489 0.370 0.306 0.294 0.318 0.364 0.418 0.472 0.524 0.577 0.643 0.733 0.854 0.996 1.129 1.212 1.206
0.821 0.785 0.680 0.540 0.406 0.307 0.253 0.242 0.262 0.299 0.344 0.388 0.430 0.474 0.528 0.602 0.702 0.818 0.927 0.995 0.991
0.675 0.646 0.559 0.444 0.333 0.251 0.206 0.197 0.212 0.243 0.278 0.314 0.348 0.384 0.428 0.488 0.568 0.663 0.751 0.806 0.803
0.549 0.525 0.454 0.361 0.270 0.203 0.166 0.158 0.170 0.194 0.222 0.251 0.278 0.307 0.342 0.390 0.455 0.530 0.601 0.646 0.643
0.442 0.422 0.365 0.290 0.217 0.162 0.132 0.125 0.134 0.153 0.175 0.198 0.220 0.242 0.270 0.308 0.359 0.419 0.475 0.510 0.508
0.351 0.336 0.290 0.230 0.172 0.128 0.104 0.098 0.105 0.119 0.136 0.154 0.171 0.188 0.210 0.240 0.280 0.327 0.371 0.399 0.397

# Matrix: Standard Deviation
18.654 18.654 18.654 18.658 18.676 18.738 18.893 19.109 19.272 19.346 19.357 19.322 19.232 19.077 18.879 18.714 18.654 18.694 18.781 18.869 18.940
18.655 18.654 18.654 18.655 18.667 18.722 18.865 19.070 19.226 19.297 19.308 19.276 19.193 19.049 18.864 18.710 18.654 18.692 18.776 18.861 18.930
18.658 18.657 18.655 18.654 18.660 18.704 18.833 19.024 19.172 19.239 19.250 19.221 19.145 19.014 18.845 18.704 18.654 18.692 18.773 18.855 18.921
18.666 18.664 18.660 18.655 18.655 18.687 18.799 18.973 19.110 19.173 19.184 19.158 19.090 18.973 18.821 18.696 18.654 18.693 18.771 18.850 18.914
18.679 18.676 18.670 18.662 18.654 18.672 18.764 18.918 19.043 19.100 19.111 19.089 19.030 18.926 18.795 18.687 18.654 18.696 18.772 18.848 18.909
18.698 18.694 18.686 18.673 18.657 18.660 18.730 18.862 18.972 19.024 19.034 19.016 18.965 18.877 18.765 18.676 18.655 18.701 18.776 18.849 18.908
18.723 18.718 18.708 18.691 18.667 18.654 18.700 18.808 18.901 18.947 18.956 18.941 18.899 18.826 18.735 18.667 18.658 18.708 18.782 18.854 18.910
18.754 18.748 18.737 18.716 18.683 18.655 18.676 18.757 18.834 18.871 18.879 18.867 18.834 18.777 18.707 18.659 18.664 18.718 18.792 18.862 18.915
18.790 18.784 18.771 18.747 18.707 18.664 18.660 18.714 18.772 18.802 18.808 18.799 18.774 18.732 18.682 18.654 18.673 18.732 18.806 18.872 18.924
18.832 18.824 18.810 18.783 18.738 18.681 18.654 18.680 18.720 18.741 18.747 18.740 18.723 18.694 18.664 18.655 18.686 18.749 18.822 18.886 18.935
18.876 18.868 18.854 18.825 18.775 18.707 18.659 18.659 18.681 18.694 18.698 18.694 18.684 18.667 18.654 18.662 18.704 18.771 18.842 18.902 18.948
18.922 18.915 18.900 18.870 18.818 18.742 18.676 18.654 18.658 18.664 18.666 18.664 18.660 18.654 18.656 18.678 18.728 18.796 18.864 18.920 18.962
18.969 18.961 18.947 18.918 18.865 18.785 18.706 18.665 18.654 18.654 18.654 18.654 18.654 18.657 18.670 18.703 18.758 18.824 18.888 18.939 18.976
19.014 19.007 18.994 18.966 18.915 18.835 18.748 18.693 18.671 18.664 18.663 18.664 18.667 18.677 18.698 18.737 18.793 18.855 18.912 18.957 18.989
19.058 19.052 19.039 19.014 18.967 18.890 18.801 18.737 18.707 18.696 18.694 18.695 18.701 18.714 18.739 18.780 18.833 18.888 18.937 18.974 19.001
19.100 19.094 19.083 19.061 19.019 18.949 18.864 18.797 18.763 18.749 18.746 18.747 18.754 18.768 18.793 18.830 18.876 18.922 18.960 18.990 19.010
19.139 19.134 19.125 19.107 19.072 19.012 18.935 18.871 18.836 18.821 18.817 18.819 18.824 18.836 18.857 18.887 18.921 18.954 18.982 19.002 19.016
19.177 19.173 19.166 19.152 19.124 19.075 19.012 18.956 18.923 18.910 18.906 18.906 18.909 18.917 18.930 18.947 18.967 18.985 19.000 19.010 19.018
19.214 19.211 19.206 19.196 19.176 19.141 19.092 19.048 19.022 19.010 19.006 19.005 19.005 19.006 19.007 19.009 19.011 19.012 19.014 19.014 19.015
19.253 19.252 19.249 19.242 19.230 19.207 19.176 19.147 19.128 19.120 19.116 19.113 19.109 19.101 19.087 19.070 19.052 19.035 19.023 19.014 19.008
19.297 19.296 19.295 19.292 19.287 19.277 19.262 19.248 19.239 19.235 19.231 19.226 19.216 19.197 19.167 19.129 19.088 19.053 19.027 19.008 18.996
