# Supplementary material for: New Approach for Automated Explanation of Material Phenomena Using Artificial Neural Networks
Source: Preprints.org preprint supplement (doi:10.20944/preprints202403.1074.v2), 2024-06-21
Supplement: Supplementary file 1 [file supplementary › Supplemental_Materials/data_matrices_Yield_Strenght_x=Casting_speed_y=Si_fix=ram_speed_Fig5.txt]

# Matrix: Prediction
321.880 321.805 321.653 321.344 320.723 319.600 318.015 316.504 315.570 315.176 315.089 315.195 315.513 316.139 317.148 318.473 319.884 321.128 322.084 322.755 323.203
322.074 321.998 321.845 321.534 320.909 319.781 318.194 316.685 315.756 315.362 315.274 315.375 315.682 316.288 317.265 318.554 319.930 321.148 322.087 322.747 323.188
322.303 322.227 322.074 321.761 321.133 320.002 318.414 316.911 315.986 315.595 315.505 315.601 315.895 316.478 317.420 318.667 320.003 321.190 322.107 322.754 323.187
322.566 322.489 322.335 322.021 321.392 320.261 318.677 317.181 316.263 315.874 315.783 315.873 316.154 316.711 317.616 318.816 320.107 321.258 322.150 322.781 323.203
322.858 322.781 322.628 322.314 321.686 320.558 318.982 317.497 316.587 316.201 316.109 316.193 316.460 316.991 317.855 319.005 320.246 321.356 322.218 322.830 323.240
323.177 323.100 322.948 322.636 322.012 320.891 319.329 317.859 316.959 316.577 316.484 316.561 316.814 317.318 318.140 319.235 320.421 321.486 322.315 322.903 323.299
323.518 323.442 323.291 322.983 322.366 321.260 319.717 318.267 317.379 317.002 316.908 316.979 317.217 317.693 318.469 319.507 320.634 321.648 322.439 323.002 323.380
323.876 323.802 323.654 323.351 322.746 321.660 320.145 318.719 317.846 317.475 317.380 317.445 317.667 318.114 318.843 319.820 320.883 321.841 322.590 323.123 323.482
324.248 324.176 324.032 323.737 323.148 322.089 320.610 319.215 318.359 317.994 317.899 317.956 318.163 318.579 319.259 320.171 321.165 322.061 322.763 323.263 323.599
324.629 324.559 324.420 324.136 323.567 322.543 321.107 319.749 318.913 318.555 318.460 318.511 318.701 319.085 319.713 320.556 321.474 322.304 322.954 323.417 323.729
325.014 324.948 324.815 324.544 323.999 323.015 321.631 320.316 319.504 319.155 319.060 319.104 319.276 319.626 320.199 320.968 321.806 322.564 323.157 323.580 323.865
325.400 325.338 325.212 324.955 324.438 323.501 322.177 320.911 320.125 319.786 319.691 319.727 319.881 320.195 320.710 321.401 322.153 322.833 323.365 323.745 324.001
325.783 325.724 325.607 325.365 324.879 323.995 322.737 321.525 320.769 320.439 320.345 320.374 320.509 320.785 321.239 321.847 322.509 323.106 323.573 323.907 324.131
326.161 326.106 325.996 325.772 325.319 324.491 323.303 322.150 321.425 321.107 321.013 321.034 321.149 321.386 321.775 322.297 322.864 323.375 323.775 324.059 324.251
326.531 326.480 326.380 326.172 325.753 324.983 323.869 322.777 322.085 321.779 321.686 321.698 321.792 321.989 322.311 322.743 323.212 323.634 323.963 324.198 324.355
326.893 326.847 326.755 326.565 326.180 325.467 324.428 323.398 322.738 322.444 322.351 322.355 322.428 322.583 322.837 323.177 323.546 323.877 324.135 324.318 324.441
327.251 327.209 327.125 326.952 326.598 325.942 324.974 324.004 323.376 323.094 323.001 322.996 323.047 323.159 323.344 323.592 323.859 324.098 324.285 324.417 324.505
327.608 327.570 327.494 327.336 327.012 326.408 325.506 324.590 323.991 323.719 323.626 323.611 323.640 323.710 323.825 323.979 324.145 324.294 324.409 324.491 324.545
327.976 327.942 327.872 327.727 327.430 326.870 326.025 325.155 324.578 324.312 324.218 324.194 324.200 324.227 324.273 324.335 324.401 324.460 324.505 324.538 324.559
328.374 328.342 328.277 328.143 327.867 327.341 326.539 325.699 325.134 324.870 324.773 324.739 324.722 324.706 324.683 324.653 324.621 324.593 324.571 324.556 324.546
328.835 328.804 328.743 328.616 328.352 327.848 327.066 326.231 325.660 325.391 325.286 325.241 325.202 325.143 325.052 324.932 324.804 324.691 324.605 324.544 324.503

# Matrix: Density
1.154 1.103 0.955 0.758 0.569 0.428 0.351 0.335 0.361 0.412 0.473 0.534 0.595 0.659 0.741 0.855 1.009 1.190 1.361 1.470 1.470
1.270 1.214 1.051 0.835 0.627 0.472 0.388 0.370 0.400 0.456 0.524 0.592 0.658 0.729 0.819 0.943 1.111 1.308 1.495 1.613 1.612
1.362 1.302 1.128 0.896 0.673 0.507 0.418 0.399 0.431 0.493 0.566 0.639 0.711 0.786 0.882 1.014 1.192 1.401 1.599 1.724 1.722
1.425 1.363 1.180 0.938 0.705 0.532 0.439 0.420 0.454 0.519 0.596 0.673 0.748 0.827 0.926 1.063 1.248 1.464 1.668 1.797 1.794
1.457 1.394 1.207 0.959 0.722 0.545 0.450 0.431 0.466 0.533 0.612 0.692 0.768 0.849 0.949 1.088 1.274 1.493 1.699 1.829 1.825
1.457 1.393 1.207 0.959 0.722 0.546 0.451 0.432 0.468 0.535 0.614 0.694 0.770 0.851 0.950 1.088 1.272 1.488 1.692 1.819 1.814
1.426 1.365 1.182 0.940 0.707 0.535 0.442 0.424 0.459 0.525 0.602 0.680 0.755 0.833 0.930 1.063 1.241 1.451 1.648 1.771 1.765
1.370 1.310 1.135 0.902 0.679 0.513 0.424 0.406 0.440 0.503 0.578 0.652 0.724 0.798 0.890 1.017 1.186 1.385 1.572 1.689 1.683
1.291 1.235 1.069 0.850 0.639 0.483 0.399 0.382 0.413 0.472 0.542 0.612 0.679 0.749 0.835 0.953 1.111 1.296 1.471 1.579 1.573
1.196 1.144 0.991 0.787 0.592 0.446 0.368 0.352 0.380 0.435 0.499 0.563 0.625 0.689 0.767 0.876 1.020 1.190 1.350 1.449 1.443
1.090 1.043 0.902 0.717 0.538 0.405 0.334 0.318 0.343 0.392 0.450 0.508 0.563 0.621 0.692 0.790 0.920 1.073 1.217 1.306 1.301
0.978 0.936 0.810 0.643 0.482 0.362 0.297 0.282 0.304 0.347 0.399 0.450 0.499 0.550 0.613 0.700 0.815 0.951 1.079 1.158 1.153
0.865 0.827 0.716 0.568 0.425 0.319 0.261 0.247 0.265 0.303 0.347 0.392 0.434 0.479 0.534 0.610 0.711 0.829 0.941 1.010 1.006
0.755 0.722 0.624 0.495 0.370 0.276 0.225 0.212 0.228 0.259 0.297 0.335 0.372 0.410 0.458 0.523 0.610 0.712 0.808 0.868 0.865
0.650 0.622 0.537 0.425 0.318 0.236 0.191 0.180 0.192 0.219 0.250 0.283 0.314 0.346 0.386 0.441 0.516 0.602 0.684 0.735 0.733
0.553 0.529 0.457 0.361 0.269 0.200 0.161 0.150 0.160 0.182 0.208 0.235 0.261 0.288 0.321 0.368 0.430 0.503 0.571 0.614 0.612
0.465 0.444 0.384 0.303 0.225 0.167 0.133 0.124 0.131 0.149 0.170 0.192 0.213 0.236 0.264 0.302 0.353 0.414 0.471 0.506 0.505
0.387 0.369 0.319 0.252 0.187 0.137 0.109 0.101 0.106 0.120 0.138 0.155 0.173 0.191 0.213 0.245 0.287 0.336 0.383 0.412 0.412
0.318 0.304 0.262 0.207 0.153 0.112 0.088 0.081 0.085 0.096 0.110 0.124 0.138 0.152 0.170 0.196 0.230 0.270 0.308 0.332 0.331
0.259 0.247 0.213 0.168 0.124 0.090 0.071 0.064 0.067 0.076 0.086 0.098 0.108 0.120 0.135 0.155 0.182 0.214 0.245 0.264 0.264
0.210 0.200 0.172 0.135 0.100 0.072 0.056 0.050 0.052 0.059 0.067 0.076 0.084 0.093 0.105 0.121 0.143 0.168 0.192 0.207 0.207

# Matrix: Standard Deviation
18.540 18.540 18.542 18.548 18.576 18.680 18.939 19.304 19.585 19.715 19.745 19.709 19.603 19.409 19.135 18.851 18.647 18.556 18.541 18.561 18.587
18.541 18.541 18.540 18.544 18.566 18.659 18.903 19.254 19.526 19.653 19.682 19.648 19.549 19.365 19.106 18.836 18.643 18.555 18.541 18.561 18.586
18.545 18.544 18.541 18.541 18.555 18.635 18.861 19.195 19.455 19.577 19.606 19.575 19.482 19.311 19.069 18.817 18.635 18.553 18.542 18.561 18.586
18.553 18.550 18.546 18.541 18.547 18.611 18.815 19.127 19.373 19.489 19.517 19.489 19.404 19.247 19.024 18.792 18.625 18.551 18.542 18.562 18.587
18.566 18.562 18.555 18.545 18.541 18.587 18.766 19.051 19.281 19.391 19.418 19.393 19.316 19.174 18.972 18.762 18.612 18.548 18.543 18.565 18.590
18.586 18.580 18.571 18.556 18.541 18.567 18.715 18.971 19.182 19.284 19.310 19.288 19.220 19.093 18.914 18.728 18.598 18.545 18.545 18.569 18.594
18.612 18.606 18.594 18.573 18.547 18.551 18.666 18.889 19.079 19.171 19.195 19.177 19.118 19.007 18.851 18.692 18.582 18.542 18.549 18.574 18.601
18.647 18.640 18.625 18.599 18.561 18.542 18.621 18.808 18.974 19.057 19.079 19.064 19.013 18.919 18.787 18.654 18.567 18.540 18.554 18.582 18.609
18.691 18.682 18.665 18.633 18.584 18.541 18.584 18.731 18.872 18.943 18.963 18.951 18.909 18.832 18.725 18.619 18.554 18.541 18.561 18.592 18.620
18.743 18.733 18.714 18.677 18.617 18.552 18.556 18.662 18.776 18.836 18.853 18.844 18.811 18.750 18.667 18.588 18.545 18.545 18.571 18.604 18.632
18.803 18.792 18.771 18.731 18.661 18.575 18.542 18.606 18.692 18.740 18.754 18.747 18.722 18.677 18.616 18.563 18.540 18.553 18.584 18.618 18.646
18.872 18.860 18.837 18.793 18.716 18.611 18.543 18.566 18.623 18.658 18.669 18.665 18.648 18.617 18.577 18.546 18.542 18.565 18.600 18.634 18.661
18.947 18.935 18.911 18.865 18.781 18.661 18.560 18.544 18.574 18.596 18.604 18.601 18.591 18.573 18.551 18.540 18.551 18.581 18.617 18.651 18.676
19.028 19.016 18.992 18.944 18.856 18.723 18.595 18.542 18.546 18.556 18.561 18.560 18.555 18.547 18.541 18.545 18.566 18.600 18.637 18.668 18.691
19.115 19.102 19.078 19.031 18.940 18.798 18.647 18.562 18.541 18.541 18.541 18.541 18.541 18.541 18.545 18.560 18.588 18.623 18.657 18.685 18.705
19.206 19.194 19.170 19.123 19.032 18.884 18.715 18.602 18.560 18.549 18.546 18.546 18.548 18.554 18.565 18.586 18.615 18.648 18.677 18.700 18.716
19.303 19.291 19.268 19.221 19.131 18.980 18.797 18.662 18.601 18.580 18.574 18.574 18.577 18.584 18.598 18.619 18.646 18.673 18.696 18.713 18.725
19.405 19.394 19.371 19.326 19.238 19.085 18.892 18.737 18.660 18.631 18.622 18.621 18.624 18.630 18.642 18.659 18.678 18.697 18.712 18.723 18.731
19.517 19.506 19.484 19.440 19.353 19.200 18.998 18.827 18.736 18.699 18.687 18.684 18.685 18.688 18.694 18.702 18.711 18.719 18.725 18.730 18.733
19.645 19.634 19.613 19.570 19.483 19.328 19.117 18.929 18.824 18.780 18.765 18.759 18.757 18.754 18.751 18.747 18.742 18.738 18.735 18.732 18.731
19.802 19.791 19.770 19.726 19.638 19.477 19.252 19.044 18.922 18.870 18.851 18.842 18.836 18.825 18.810 18.790 18.769 18.752 18.739 18.731 18.725
